# Supplementary material for: Flowers and Leaves Extracts of Stachys palustris L. Exhibit Stronger Anti-Proliferative, Antioxidant, Anti-Diabetic, and Anti-Obesity Potencies than Stems and Roots Due to More Phenolic Compounds as Revealed by UPLC-PDA-ESI-TQD-MS/MS
Source: MDPI journal article supplement (doi:10.3390/ph15070785), 2022-06-23
Supplement: s1 [file s1]

## Article

# Flowers and Leaves Extracts of *Stachys palustris* L. Exhibit Stronger Anti-Proliferative, Antioxidant, Anti-Diabetic, and Anti-Obesity Potencies than Stems and Roots Due to More Phenolic Compounds as Revealed by UPLC-PDA-ESI-TQD-MS/MS

Sabina Lachowicz-Wisniewska <sup>1,2,3,\*</sup>, Anubhav Pratap-Singh <sup>3</sup>, Ireneusz Kapusta <sup>4</sup>, Angelika Kruszyńska <sup>5</sup>, Andrzej Rapak <sup>5</sup>, Ireneusz Ochmian <sup>2</sup>, Tomasz Cebulak <sup>4</sup>, Wioletta Żukiewicz-Sobczak <sup>1</sup> and Paweł Rubiński <sup>1</sup>

- <sup>1</sup> Department of Food and Nutrition, Calisia University, 4 Nowy Świat Street, 62-800 Kalisz, Poland; s.lachowicz-wisniewska@akademikaliska.edu.pl (S.L.-W.), wiola.zukiewiczsobczak@gmail.com (W.Ż.-S.); p.rubinski@akademikaliska.edu.pl (P.R.)
  - <sup>2</sup> Department of Horticulture, West Pomeranian University of Technology in Szczecin, 71-434 Szczecin, Poland; ireneusz.ochmian@zut.edu.pl
  - <sup>3</sup> Faculty of Land and Food Systems (LFS), The University of British Columbia, Vancouver Campus 213-2205 East Mall, Vancouver, BC V6T 1Z4, Canada; anubhav.singh@ubc.ca
  - <sup>4</sup> Department of Food Technology and Human Nutrition, College of Natural Science, Rzeszow University, 4 Zelwerowicza Street, 35-601 Rzeszow, Poland; ikapusta@ur.edu.pl (I.K.); tomcebulak@gmail.com (T.C.)
  - <sup>5</sup> Laboratory of Tumor Molecular Immunobiology, Ludwik Hirsfeld Institute of Immunology and Experimental Therapy, Polish Academy of Sciences, 53-114 Wrocław, Poland; angelika.kruszynska@hirsfeld.pl (A.K.); andrzej.rapak@hirsfeld.pl (A.R.)
- \* Correspondence: s.lachowicz-wisniewska@akademikaliska.edu.pl

**Citation:** Lachowicz-Wisniewska, S.; Pratap Singh, A.; Kapusta, I.; Kruszyńska, A.; Rapak, A.; Ochmian, I.; Cebulak, T.; Żukiewicz-Sobczak, W.; Rubiński, P. Flowers and Leaves Extracts of *Stachys palustris* L. Exhibit Stronger Anti-Proliferative, Antioxidant, Anti-Diabetic, and Anti-Obesity Potencies than Stems and Roots Due to More Phenolic Compounds as Revealed by UPLC-PDA-ESI-TQD-MS/MS. *Pharmaceuticals* **2022**, *15*, x. <https://doi.org/10.3390/xxxxx>

Academic Editor(s): Célia Cabral

Received: 25 April 2022

Accepted: 20 June 2022

Published: date

**Publisher's Note:** MDPI stays neutral with regard to jurisdictional claims in published maps and institutional affiliations.

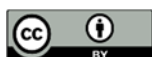

**Copyright:** © 2022 by the authors. Submitted for possible open access publication under the terms and conditions of the Creative Commons Attribution (CC BY) license (<https://creativecommons.org/licenses/by/4.0/>).

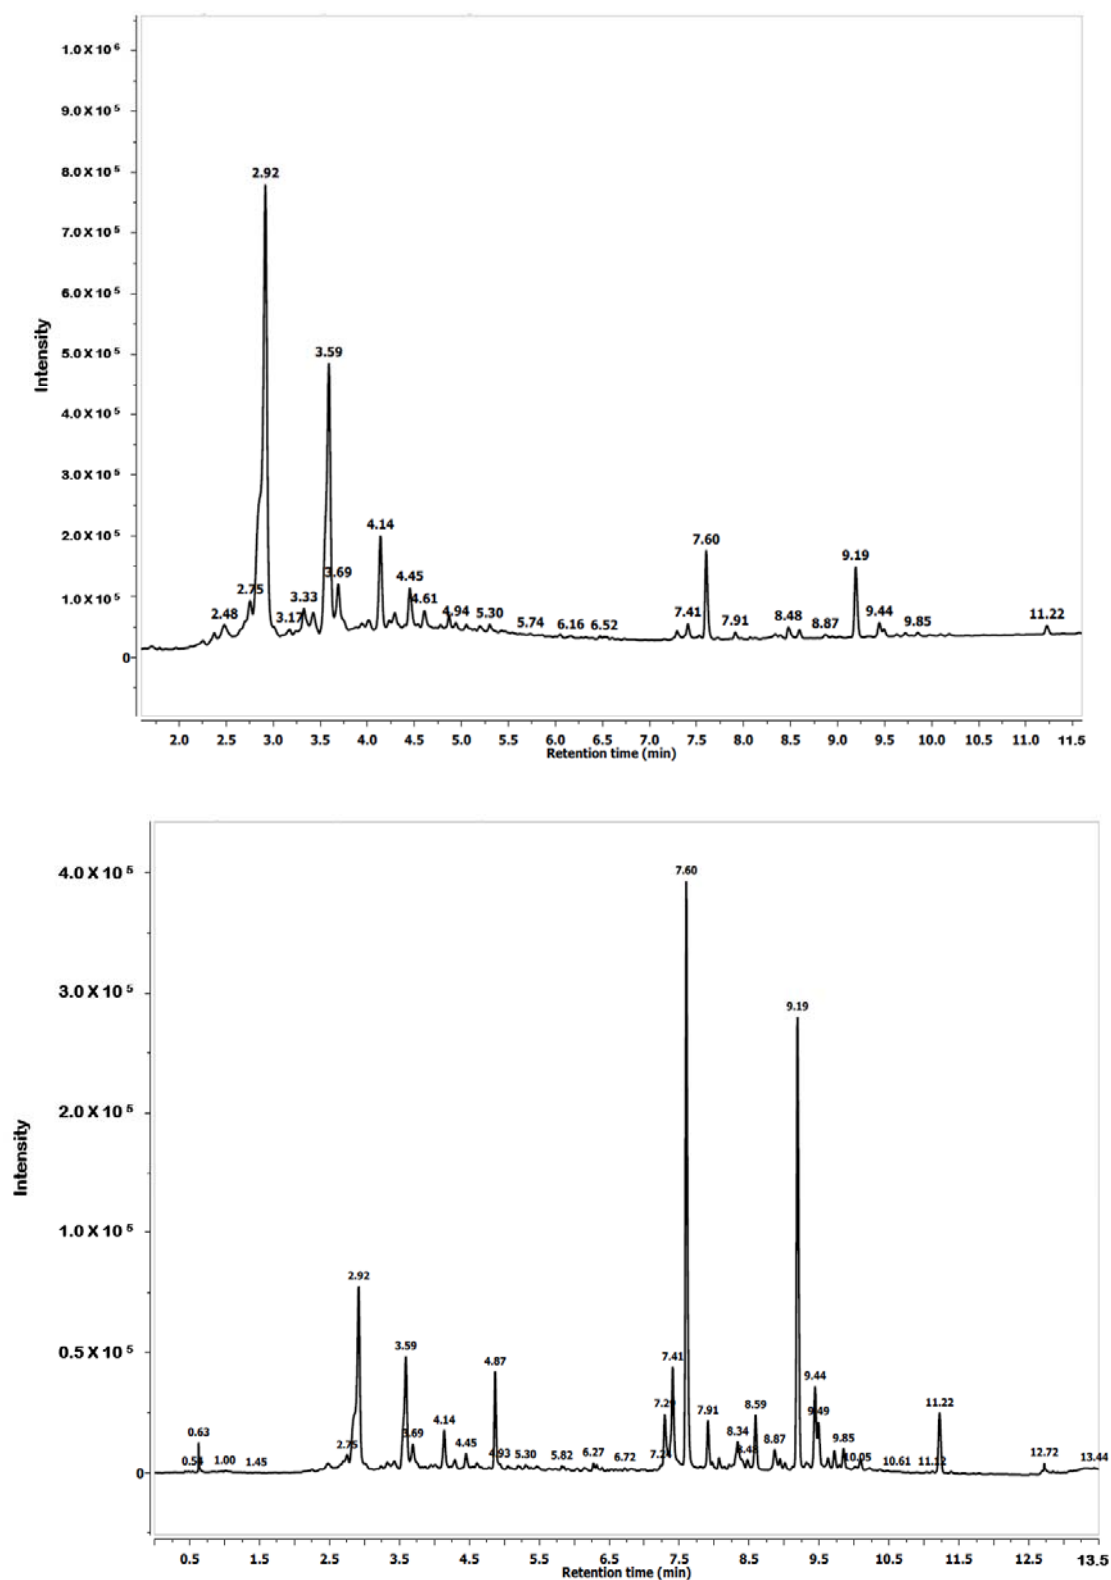

**Figure S1.** LC-DAD-ESI-TQD-MS/MS chromatogram fragile of the *Stachys palustris* L. roots extract at 280 and 320 nm.

**Table S1.** Parameter of colour.

| Parameter of colour | L*(D65)                   | a*(D65)      | b*(D65)     | NAI         | NDVI        |
|---------------------|---------------------------|--------------|-------------|-------------|-------------|
| Leaves              | 51.57±1.03 <sup>a</sup> c | -50.81±1.02d | 31.51±0.63a | -0.72±0.01d | 0.76±0.02a  |
| Flowers             | 40.82±0.82d               | 35.49±0.71a  | 13.01±0.26d | 0.67±0.01a  | 0.50±0.01c  |
| Stems               | 62.17±1.24b               | -23.00±0.46c | 25.68±0.51b | -0.41±0.01c | 0.66±0.01b  |
| Roots               | 60.70±1.21a               | 5.42±0.11b   | 21.64±0.43c | 0.11±0.00b  | -0.24±0.00d |

<sup>a</sup> Values are expressed as the mean (n = 3) ± standard deviation and different letters (between morphological parts) within the same row indicates statistically significant differences (p < 0.05).
